# Supplementary material for: Educator’s role in preventing ageism
Source: PubMed Central journal article supplement (PMC11534200; doi:10.1371/journal.pone.0313137), 2024-11-04
Supplement: pone.0313137.s003.pdf [file pone.0313137.s003.pdf]

| Construct                  | Items                                                                                                         | Mean | Std. deviation |
|----------------------------|---------------------------------------------------------------------------------------------------------------|------|----------------|
| 1: Statements about ageism | Ageism is an important determinant of health.                                                                 | 3.73 | 1.152          |
|                            | Ageism manifests itself as a stereotype that reflects thinking about older people                             | 4.23 | .742           |
|                            | Ageism manifests itself as a prejudice that reflects the perception of older people.                          | 4.13 | .818           |
|                            | Ageism manifests itself as discrimination that reflects attitudes towards older people.                       | 4.00 | .935           |
|                            | As the number of older people increases, discriminatory attitudes towards older people are reinforced.        | 3.30 | 1.105          |
|                            | Ageism is deceived.                                                                                           | 3.34 | .869           |
|                            | Ageism is unconscious                                                                                         | 3.06 | .862           |
|                            | Discrimination against older people is not a new phenomenon, but it has intensified in recent years.          | 3.70 | .878           |
|                            | Ageism also exists in health and social institutions.                                                         | 4.02 | .788           |
|                            | Ageism leads to inequality in health care.                                                                    | 4.00 | .830           |
| 2: Reasons for ageism      | Lack of knowledge.                                                                                            | 3.92 | .834           |
|                            | Anxiety associated with aging.                                                                                | 3.66 | .835           |
|                            | Age of education participants.                                                                                | 3.31 | .968           |
|                            | Growing number of older people.                                                                               | 3.52 | .922           |
|                            | Personal underestimation of older people.                                                                     | 3.88 | .945           |
|                            | Social underestimation of older people.                                                                       | 4.07 | .799           |
|                            | Displacement of older people to the margins of society.                                                       | 3.90 | .923           |
| 3: Skills to reduce ageism | Communication with older people.                                                                              | 4.35 | .626           |
|                            | Knowledge of the needs of older people.                                                                       | 4.47 | .677           |
|                            | Understanding of the heterogeneity of the older population.                                                   | 4.47 | .677           |
|                            | Understanding of the values of health professionals in relation to building a relationship with older people. | 4.31 | .748           |
|                            | Approach towards older people.                                                                                | 4.39 | .668           |

|                          |                                                                                                   |      |      |
|--------------------------|---------------------------------------------------------------------------------------------------|------|------|
|                          | Constructive collaboration of health professionals in relation to attitudes towards older people. | 4.40 | .617 |
|                          | Knowledge and respect of roles in interprofessional collaboration.                                | 4.25 | .777 |
|                          | Knowledge acquired through intergenerational collaboration.                                       | 4.42 | .601 |
|                          | Critical thinking in the context of ageism.                                                       | 4.28 | .772 |
| 4: Ageism among trainees | The training participants have prejudices (perceptions) about older people.                       | 2.97 | .580 |
|                          | Training participants have discriminatory attitudes towards older people.                         | 2.70 | .595 |
|                          | Training participants think stereotypically about older people.                                   | 3.14 | .668 |
|                          | The participants of the training have prejudices (perceptions) about working with older people.   | 2.92 | .735 |
|                          | Training participants have discriminatory attitudes about working with older people.              | 2.72 | .659 |
|                          | Training participants have stereotypical thinking about working with older people.                | 3.10 | .778 |
| 5: Educational work      | My curricula are adapted to the aging population trend.                                           | 3.93 | .905 |
|                          | I adapt my curricula to the trends of the aging population.                                       | 3.99 | .833 |
|                          | I transfer examples of good practice from Slovenia and abroad into my teaching methods.           | 3.98 | .807 |
|                          | Participants in the training have the opportunity to gain practical experience with older people. | 4.00 | .958 |
|                          | Training participants have the opportunity for intergenerational cooperation.                     | 3.76 | .969 |
|                          | Training participants have the opportunity to reflect after contact (work) with older people.     | 3.83 | .972 |

| Variables                    | Group                 | Frequency | Percent |
|------------------------------|-----------------------|-----------|---------|
| 1. Knowledge of gerontology. | Very poor             | 1         | 1.1     |
|                              | Poor                  | 2         | 2.3     |
|                              | Neither               | 18        | 20.5    |
|                              | Good                  | 56        | 63.6    |
|                              | Very good             | 11        | 12.5    |
|                              | Not interested at all | 1         | 1.1     |

|                                                       |                 |    |      |
|-------------------------------------------------------|-----------------|----|------|
| 2. Attitude toward working with older people.         | Not interested  | 2  | 2.3  |
|                                                       | Neither         | 11 | 12.5 |
|                                                       | Interested      | 47 | 53.4 |
|                                                       | Very interested | 27 | 30.7 |
| 3. Practical experience in working with older people. | Yes             | 82 | 93.2 |
|                                                       | No              | 6  | 6.8  |

| Variables                 | Parameter                                    | Frequency | Percent |
|---------------------------|----------------------------------------------|-----------|---------|
| Title                     | Assistant                                    | 13        | 10.2    |
|                           | Senior lecturer                              | 9         | 7.0     |
|                           | Lecturer                                     | 7         | 5.5     |
|                           | Docent                                       | 7         | 5.5     |
|                           | Associate professor                          | 3         | 2.3     |
|                           | Full professor                               | 3         | 2.3     |
|                           | University teacher                           | 6         | 4.7     |
|                           | Teacher                                      | 4         | 3.1     |
|                           | Teacher of practical lessons                 | 9         | 7.0     |
|                           | Organizer of practical lessons               | 2         | 1.6     |
|                           | Practical training organizer                 | 6         | 4.7     |
|                           | Organizer of work practice                   | 9         | 7.0     |
|                           | Clinical mentor                              | 24        | 18.8    |
|                           | Other                                        | 26        | 20.3    |
| Level of education (work) | Secondary school professional programs       | 4         | 3.6     |
|                           | Higher education professional study programs | 60        | 54.5    |
|                           | University study programs                    | 19        | 17.3    |
|                           | Master's study programs                      | 11        | 10.0    |
|                           | Unified master's study programs              | 6         | 5.5     |
|                           | Doctoral study programs                      | 10        | 9.1     |
|                           | Another                                      | 0         | 0       |
| Statistical region (work) | Pomurska region                              | 4         | 2.0     |
|                           | Podravska region                             | 60        | 30.5    |
|                           | Koroška region                               | 19        | 9.6     |
|                           | Savinjska region                             | 11        | 5.6     |
|                           | Zasavska region                              | 6         | 3.0     |
|                           | Posavska region                              | 10        | 5.1     |
|                           | Jugovzhodna region                           | 1         | 0.5     |

|                  |                             |                |      |
|------------------|-----------------------------|----------------|------|
|                  |                             |                |      |
|                  | Osrednjeslovenska region    | 7              | 3.6  |
|                  | Primorsko-notranjska region | 2              | 1.0  |
|                  | Goriška region              | 4              | 2.0  |
|                  | Obalno-kraška region        | 1              | 0.5  |
| Gender           | Female                      | 76             | 86.4 |
|                  | Male                        | 12             | 13.6 |
|                  |                             |                |      |
| Variable         | Mean                        | Std. deviation |      |
| Years of service | 23.66                       | 10.91          |      |
| Age              | 48.02 (mean)                | 10.60          |      |
